# Supplementary material
Source: PubMed Central journal article supplement (PMC7239735)
Supplement: NIHMS1063152-supplement-Supp_FigS1-9.pdf [file NIHMS1063152-supplement-Supp_FigS1-9.pdf]

**Activation of nicotinic acetylcholine receptors induces potentiation and synchronization within *in vitro* hippocampal networks**

Sarra Djemil<sup>1</sup>, Xin Chen<sup>2</sup>, Ziyue Zhang<sup>2</sup>, Jisoo Lee<sup>1</sup>, Mikael Rauf<sup>3</sup>, Daniel T.S. Pak<sup>1,4</sup>, Rhonda Dzakpasu<sup>1,2,4</sup>

<sup>1</sup> Department of Pharmacology and Physiology, Georgetown University Medical Center, Washington, District of Columbia, USA

<sup>2</sup> Department of Physics, Georgetown University, Washington, District of Columbia, USA

<sup>3</sup> Department of Human Science, Georgetown University Medical Center, Washington, District of Columbia, USA

<sup>4</sup> Interdisciplinary Program in Neuroscience, Georgetown University Medical Center, Washington, District of Columbia, USA

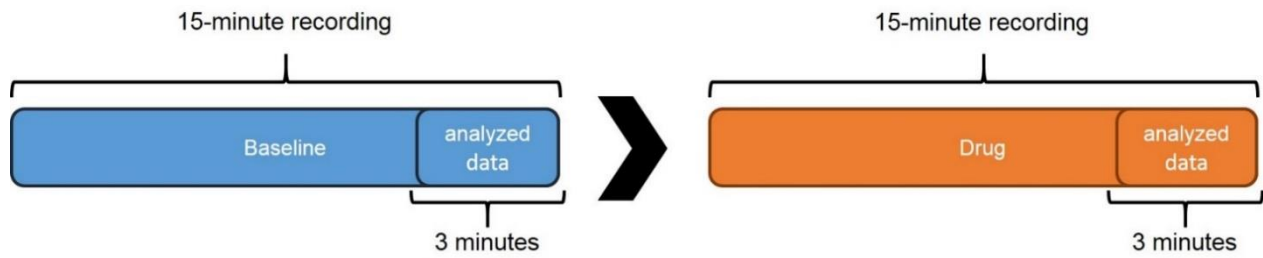

**Spikes:** High-pass (>200 Hz) filtered voltage thresholded at  $-4.5\sigma$   
**Bursts:** 4 or more spikes whose inter-spike interval < 100 ms  
**Spikes within bursts:** spikes contained in bursts/total spikes  
 Change calculated as  $\frac{\text{drug-induced activity} - \text{baseline activity}}{\text{baseline activity}}$

**Figure S1.** Schematic of the experimental design and analysis of spiking data.

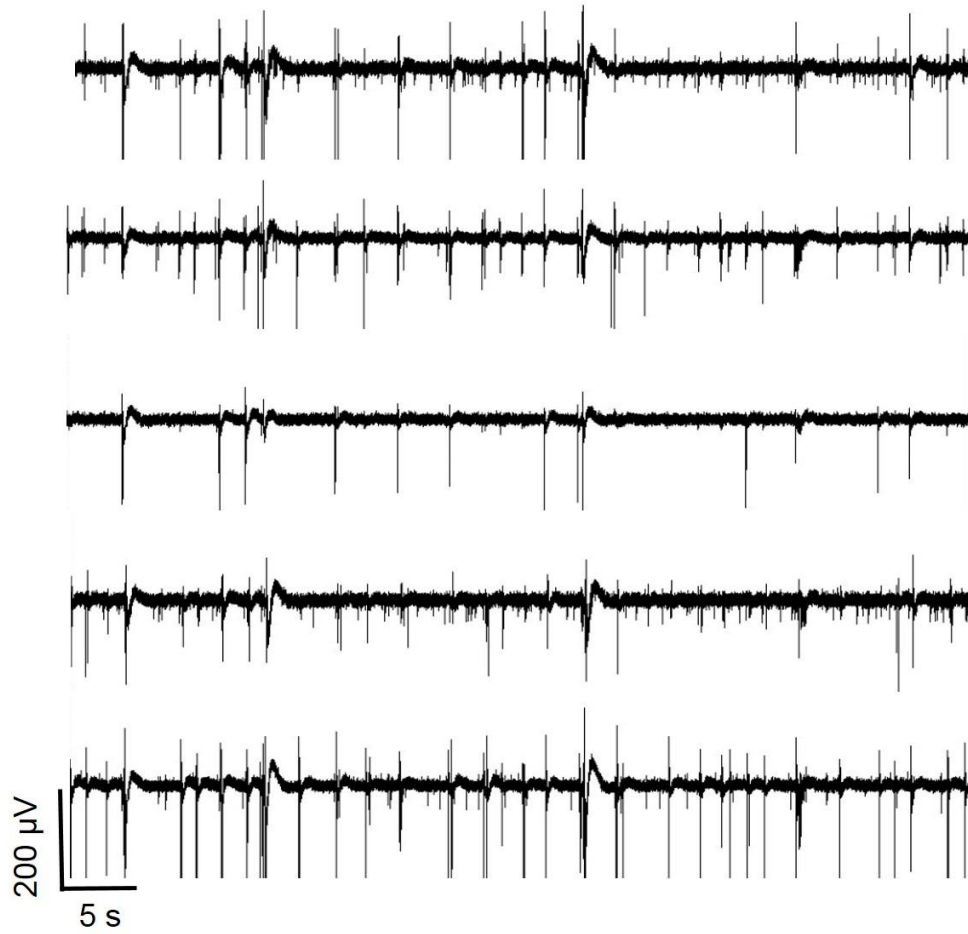

**Figure S2.** Spontaneous activity from primary cultured DIV14 rat hippocampal neural networks depicting 1-minute traces of raw baseline network activity from 5 representative electrodes (voltage display cutoff at 200  $\mu\text{V}$ ).

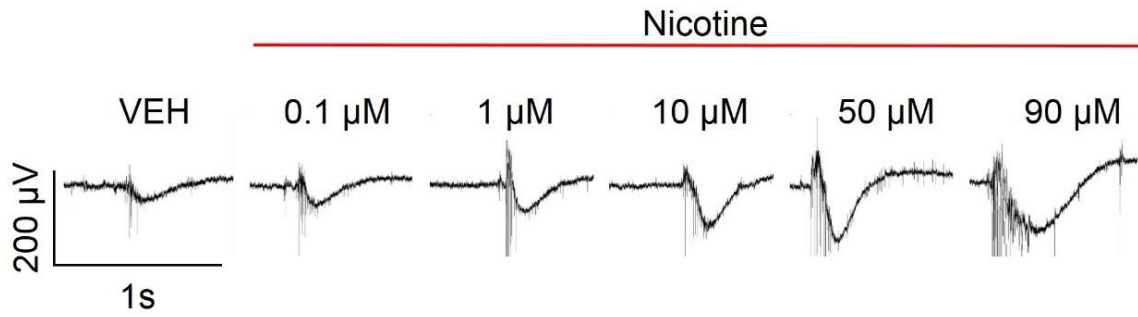

**Figure S3.** Single representative electrode 1 second traces of raw signal from nicotine or vehicle-treated DIV14 primary cultured rat hippocampal neural networks (voltage display cutoff at 200  $\mu\text{V}$ ).

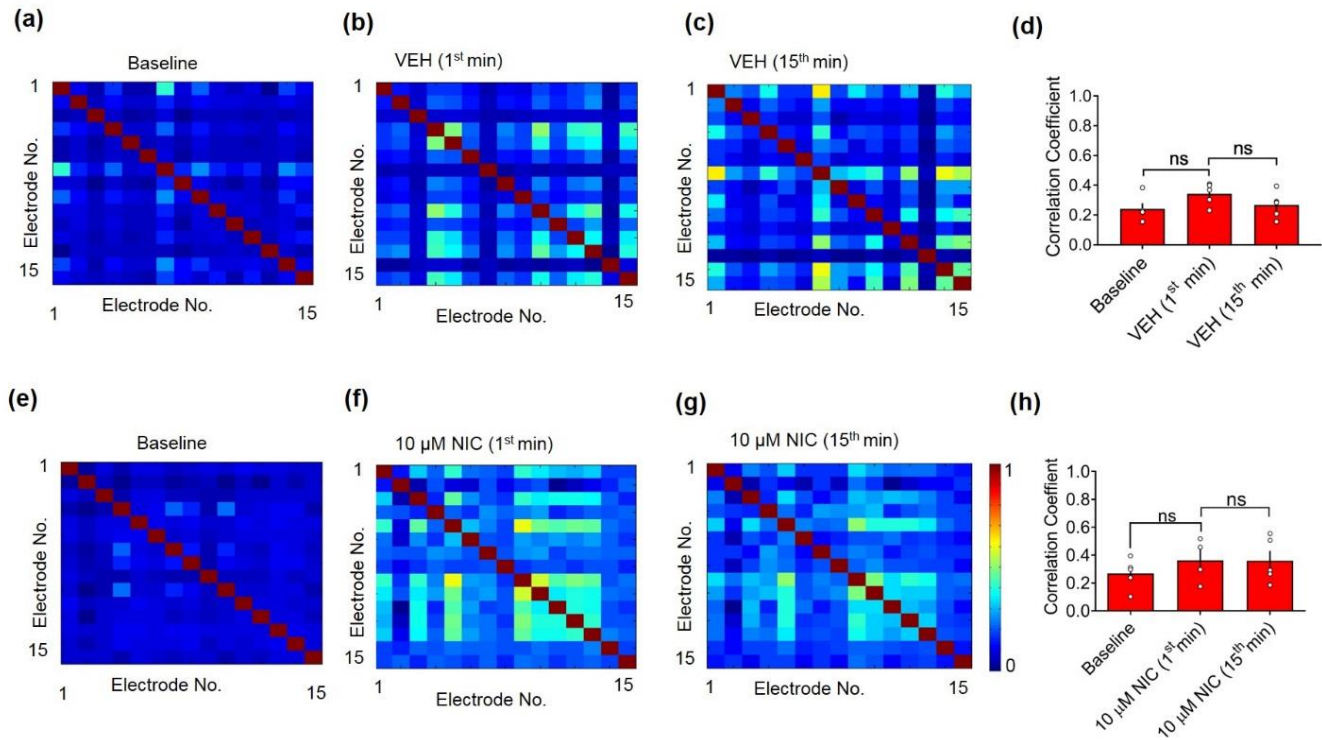

**Figure S4.** Vehicle and 10  $\mu$ M nicotine do not induce network synchrony. (a-c) Representative spatial maps of correlation coefficients between active electrodes of the network at (a) baseline, (b) 1 minute, and (c) 15 minutes after applying vehicle. (d) Quantification of a-c. (e-g) Representative spatial maps of correlation coefficients between active electrodes of the network at (e) baseline, (f) 1 minute, and (g) 15 minutes after applying 10  $\mu$ M nicotine. (h) Quantification of e-g. Statistical significance was assessed by a repeated-measures ANOVA, followed by a Tukey's post hoc correction (ns = not significant).

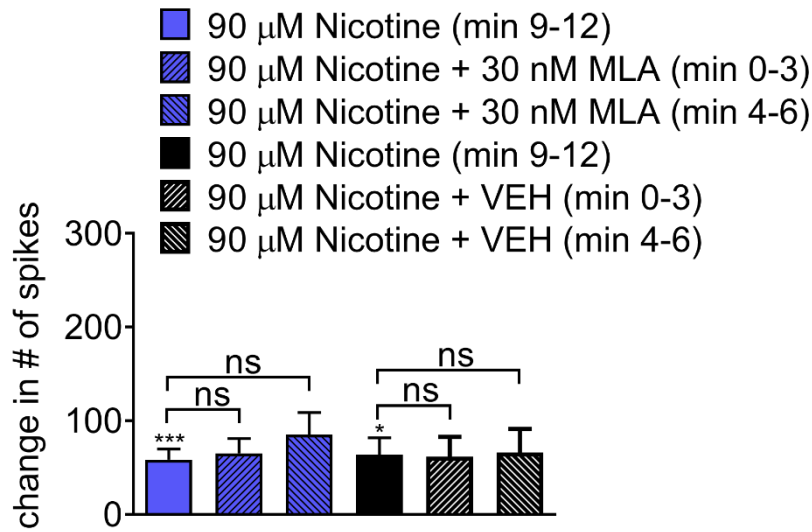

**Figure S5.** Steady-state activity of  $\alpha 7$  nAChRs does not contribute to the long-lasting effects of nicotine on spiking. Effects of 90  $\mu$ M nicotine on spikes (before and during co-application with the  $\alpha 7$  nAChR antagonist, MLA [blue] or vehicle [black]). 90  $\mu$ M nicotine increases in spiking (min. 9-12). When applied for 6 minutes at the 13th minute of stimulation with 90  $\mu$ M nicotine, both MLA [blue] and vehicle [black] do not significantly change the spiking. Baseline spiking values presented as mean  $\pm$  SEM: MLA-treated group ( $0.584829 \pm 0.1309$ ,  $n=5$ ); vehicle-treated group ( $0.637065 \pm 0.140104$ ,  $n=3$ ). Statistical significance of the treatment with 90  $\mu$ M nicotine was calculated via a one-sample t-test. Statistical difference between the effect of nicotine before or after the application of MLA or vehicle was assessed by a repeated-measures ANOVA, followed by a Tukey's post hoc. (\* $p < 0.05$  and \*\*\* $p < 0.001$ ). Data are normalized to baseline.

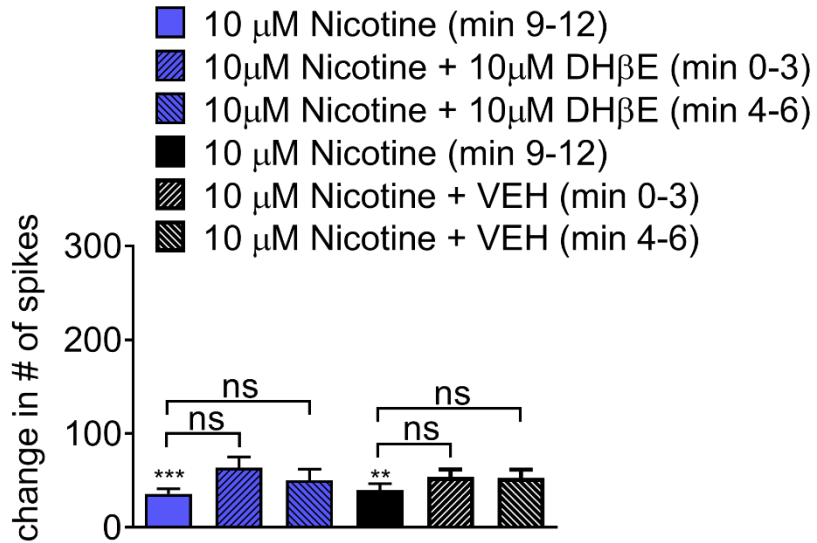

**Figure S6.** Steady-state of  $\alpha 4\beta 2$  nAChRs does not contribute to the long-lasting effects of nicotine on spiking. Effects of 10  $\mu\text{M}$  nicotine on spiking (before and during co-application with the  $\alpha 4\beta 2$  nAChR antagonist, DH $\beta$ E [blue] or vehicle [black]). 10  $\mu\text{M}$  nicotine increases in spiking (min. 9-12). When applied for 6 minutes at the 13th minute of stimulation with 10  $\mu\text{M}$  nicotine, both DH $\beta$ E [blue] and vehicle [black] do not significantly change the spiking. Baseline spiking values presented as mean  $\pm$  SEM: DH $\beta$ E -treated group ( $0.359944 \pm 0.045189$ ,  $n=4$ ); vehicle-treated group ( $0.371782 \pm 0.074619$ ,  $n=3$ ). Statistical significance of the treatment with 10  $\mu\text{M}$  nicotine was calculated via a one-sample t-test. Statistical difference between the effect of nicotine before or after the application of DH $\beta$ E or vehicle was assessed by a repeated-measures ANOVA, followed by a Tukey's post hoc. (\*\* $p < 0.01$  \*\*\* $p < 0.001$ ). Data are normalized to baseline.

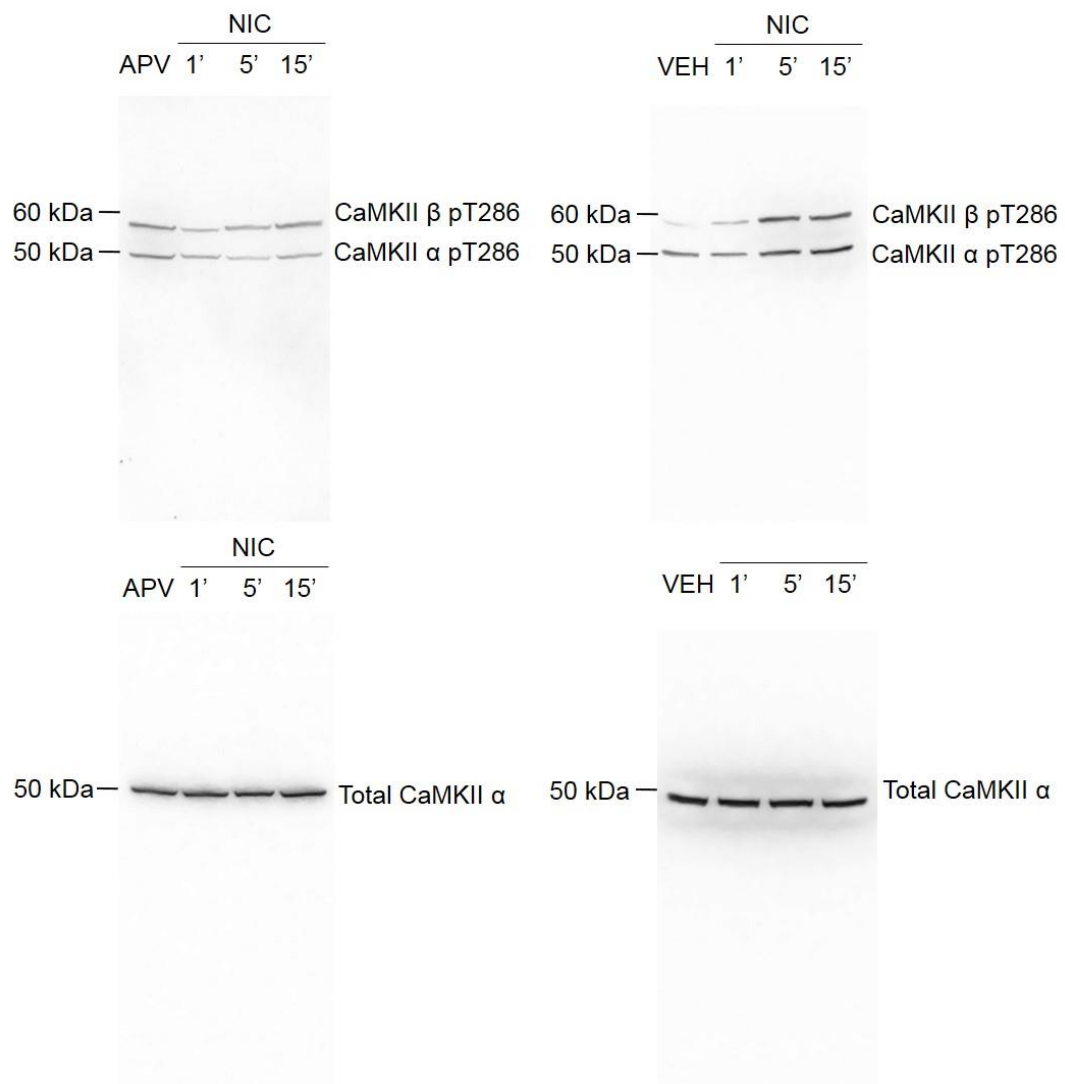

**Figure S7.** Full blots from Figure 6.



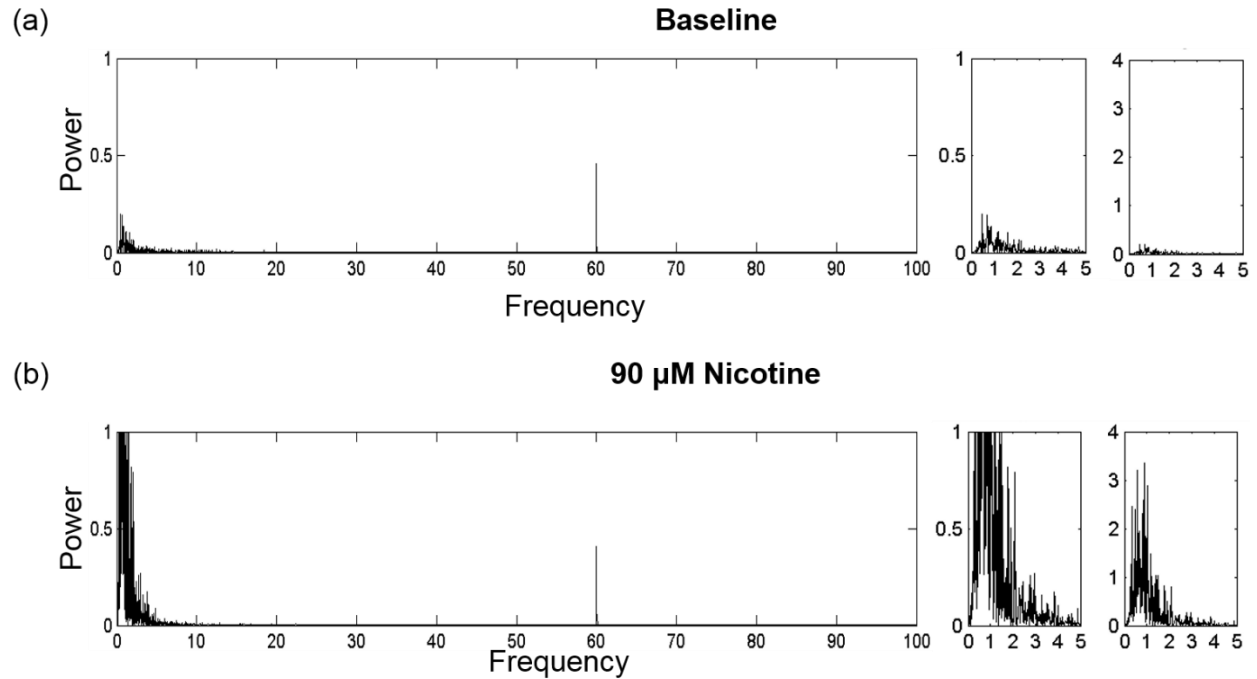

**Figure S8.** Representative power spectrum plots of 1 KHz down-sampled data. Nicotine strengthens but does not alter the frequency of preexisting network oscillations. The power of preexisting oscillations (a) was increased by 90  $\mu$ M nicotine (b) in the range between 0-5 Hz (expanded view of this range shown in graphs to the right). Note that the 60 Hz peak is power-line noise and is present in both baseline (a) and post-nicotine treatment (b).

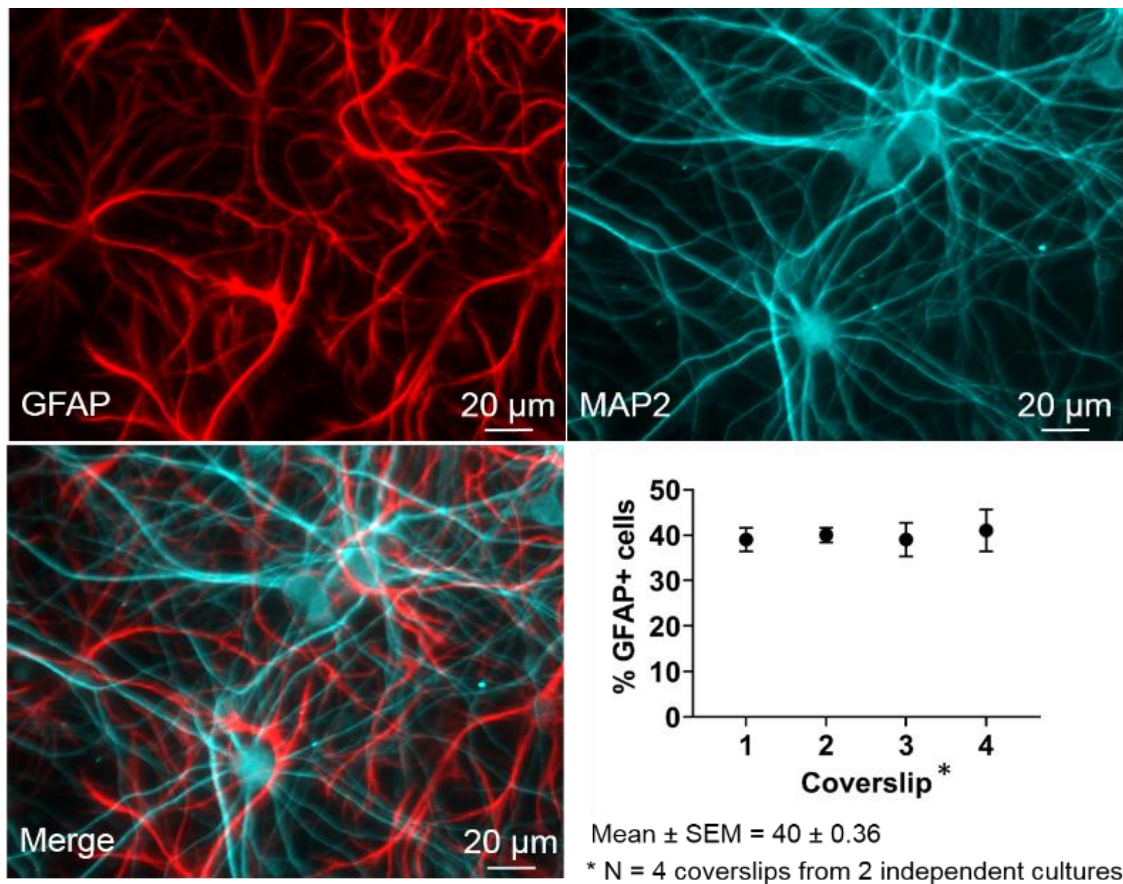

**Figure S9.** Astroglial quantification in primary hippocampal cultures. Cultures (DIV14) grown on glass coverslips were immunostained using anti-GFAP (red, upper left panel) and anti-MAP2 (cyan, upper right panel) antibodies, with merged images shown as indicated (lower left panel). The percentage of GFAP<sup>+</sup> cells ( $100 \cdot \text{GFAP}^+ / (\text{GFAP}^+ + \text{MAP2}^+)$ ) is quantified at bottom right. Mean  $\pm$  SEM =  $40 \pm 0.36$ ; N=4 coverslips from 2 independent cultures.

### Baseline values for Figures 2, 3, and 5.

**Fig. 2.** Baseline values for **nicotine** treated cultures reported as mean  $\pm$  SEM (N=5 for each treatment). *Spikes*: nicotine 0.1  $\mu$ M {23120  $\pm$  6564}, 1  $\mu$ M {11383  $\pm$  993}, 10  $\mu$ M {28681  $\pm$  5244}, 50  $\mu$ M {11596  $\pm$  2360}, 90  $\mu$ M {21909  $\pm$  4741}, VEH {9555  $\pm$  1966}; *Bursts*: nicotine 0.1  $\mu$ M {1296  $\pm$  386}, 1  $\mu$ M {737  $\pm$  84}, 10  $\mu$ M {1767  $\pm$  308}, 50  $\mu$ M {768  $\pm$  188}, 90  $\mu$ M {1245  $\pm$  290}, VEH {646  $\pm$  97}; *Spikes within bursts (as a fraction of the total number of spikes)*: nicotine 0.1  $\mu$ M {0.51  $\pm$  0.09}, 1  $\mu$ M {0.52  $\pm$  0.04}, 10  $\mu$ M {0.60  $\pm$  0.05}, 50  $\mu$ M {0.54  $\pm$  0.06}, 90  $\mu$ M {0.43  $\pm$  0.02}, VEH {0.59  $\pm$  0.03}.

**Fig. 3** Baseline values for **MLA** treated cultures reported as mean  $\pm$  SEM (N=5 for each treatment), *Spikes*: VEH {9555  $\pm$  1966}, 30 nM MLA {10773  $\pm$  1613}, 30 nM MLA + 90  $\mu$ M nicotine {10773  $\pm$  1613}, 90  $\mu$ M nicotine {21909  $\pm$  4741}; *Bursts*: VEH {646  $\pm$  97}, 30 nM MLA {530  $\pm$  125}, 30 nM MLA + 90  $\mu$ M nicotine {530  $\pm$  125}, 90  $\mu$ M nicotine {1245  $\pm$  290}; *Spikes within bursts (as a fraction of the total number of spikes)*: VEH {0.59  $\pm$  0.03}, 30nM MLA {0.50  $\pm$  0.07}, 30 nM MLA + 90  $\mu$ M nicotine {0.50  $\pm$  0.07}, 90  $\mu$ M nicotine {0.43  $\pm$  0.02}. Baseline values for **SAZ-A** treated cultures reported as mean  $\pm$  SEM (N=5 for each treatment), *Spikes*: VEH {9555  $\pm$  1966}, 1  $\mu$ M SAZ-A {22300  $\pm$  5658}, 1  $\mu$ M SAZ-A + 90  $\mu$ M nicotine {22300  $\pm$  5658}, 90  $\mu$ M nicotine {21909  $\pm$  4741}; *Bursts*: VEH {646  $\pm$  97}, 1  $\mu$ M SAZ-A {1199  $\pm$  326}, 1  $\mu$ M SAZ-A + 90  $\mu$ M nicotine {1199  $\pm$  326}, 90  $\mu$ M nicotine {1245  $\pm$  290}; *Spikes within bursts (as a fraction of the total number of spikes)*: VEH {0.59  $\pm$  0.03}, 1 $\mu$ M SAZ-A {0.49  $\pm$  0.06} , 1  $\mu$ M SAZ-A + 90  $\mu$ M nicotine {0.49  $\pm$  0.06}, 90  $\mu$ M nicotine {0.43  $\pm$  0.02}. Baseline values for **AT-1001** treated cultures reported as mean  $\pm$  SEM (N=5 for each treatment), *Spikes*: VEH {9555  $\pm$  1966}, 20  $\mu$ M AT-1001 {14338  $\pm$  1496}, 20  $\mu$ M AT-1001 + 90  $\mu$ M nicotine {14338  $\pm$  1496},

90  $\mu$ M nicotine {21909  $\pm$  4741}; *Bursts*: VEH {646  $\pm$  97}, 20  $\mu$ M AT-1001 {1065  $\pm$  148}, 20  $\mu$ M AT-1001 + 90  $\mu$ M nicotine {1065  $\pm$  148}, 90  $\mu$ M nicotine {1245  $\pm$  290}; *Spikes within bursts (as a fraction of the total number of spikes)*: VEH {0.59  $\pm$  0.03}, 20  $\mu$ M AT-1001 {0.52  $\pm$  0.04}, 20  $\mu$ M AT-1001 + 90  $\mu$ M nicotine {0.52  $\pm$  0.04}, 90  $\mu$ M nicotine {0.43  $\pm$  0.02}.

**Fig. 5** Baseline values for **MK-801** treated cultures reported as mean  $\pm$  SEM (N=4 for each treatment), *Spikes*: VEH {9555  $\pm$  1966}, 10  $\mu$ M MK-801 {7336  $\pm$  704}, 10  $\mu$ M MK-801 + 90  $\mu$ M nicotine {7336  $\pm$  704}, 90  $\mu$ M nicotine {21909  $\pm$  4741}; *Bursts*: VEH {646  $\pm$  97}, 10  $\mu$ M MK-801 {376  $\pm$  69}, 10  $\mu$ M MK-801 + 90  $\mu$ M nicotine {376  $\pm$  69}, 90  $\mu$ M nicotine {1245  $\pm$  290}; *Spikes within bursts (as a fraction of the total number of spikes)*: VEH {0.59  $\pm$  0.03}, 10  $\mu$ M MK-801 {0.37  $\pm$  0.07}, 10  $\mu$ M MK-801 + 90  $\mu$ M nicotine {0.37  $\pm$  0.07}, 90  $\mu$ M nicotine {0.43  $\pm$  0.02}. Baseline values for **MPEP + 3-MATIDA** treated cultures reported as mean  $\pm$  SEM (N=4 for each treatment), *Spikes*: VEH {9555  $\pm$  1966}, 1  $\mu$ M MPEP & 100  $\mu$ M 3-MATIDA {12100  $\pm$  11529}, 1  $\mu$ M MPEP & 100  $\mu$ M 3-MATIDA + 90  $\mu$ M nicotine {12100  $\pm$  11529}, 90  $\mu$ M nicotine {21909  $\pm$  4741}; *Bursts*: VEH {646  $\pm$  97}, 1  $\mu$ M MPEP & 100  $\mu$ M 3-MATIDA {778  $\pm$  132}, 1  $\mu$ M MPEP & 100  $\mu$ M 3-MATIDA + 90  $\mu$ M nicotine {778  $\pm$  132}, 90  $\mu$ M nicotine {1245  $\pm$  290}; *Spikes within bursts (as a fraction of the total number of spikes)*: VEH {0.59  $\pm$  0.03}, 1  $\mu$ M MPEP & 100  $\mu$ M 3-MATIDA {0.56  $\pm$  0.02}, 1  $\mu$ M MPEP & 100  $\mu$ M 3-MATIDA + 90  $\mu$ M nicotine {0.56  $\pm$  0.02}, 90  $\mu$ M nicotine {0.43  $\pm$  0.02}.
